# Supplementary material for: Spatial Variability of Heat-Related Mortality in Barcelona from 1992–2015: A Case Crossover Study Design
Source: MDPI journal article supplement (doi:10.3390/ijerph17072553), 2020-04-08
Supplement: s1 [file s1]

**Table S1.** District wise relative risk for all-cause mortality (lag 0–3 days) by age group during the study period 1992–2015 in Barcelona.

| District Name       | Age <79       |           | Age >80       |           |
|---------------------|---------------|-----------|---------------|-----------|
|                     | Relative Risk | 95% CI    | Relative Risk | 95% CI    |
| Cuitat Vella        | 1.06          | 0.92–1.22 | 1.13          | 0.98–1.31 |
| Eixample            | 1.09          | 0.99–1.20 | 1.22          | 1.13–1.32 |
| Sants-Montjuïc      | 1.08          | 0.97–1.22 | 1.15          | 1.03–1.29 |
| Les Corts           | 0.87          | 0.72–1.06 | 1.01          | 0.85–1.20 |
| Sarrià-Sant Gervasi | 1.07          | 0.92–1.24 | 1.03          | 0.91–1.16 |
| Gràcia              | 1.10          | 0.95–1.27 | 1.18          | 1.04–1.33 |
| Horta-Guinardó      | 1.17          | 1.04–1.32 | 1.23          | 1.10–1.38 |
| Nou-Barris          | 1.01          | 0.90–1.14 | 1.16          | 1.02–1.32 |
| Sant Andreu         | 1.19          | 1.04–1.37 | 1.32          | 1.15–1.52 |
| Sant Martí          | 1.06          | 0.95–1.18 | 1.23          | 1.10–1.37 |

**Table S2.** District wise relative risk for all-cause mortality (lag 0–3 days) by sex group during the study period 1992–2015 in Barcelona.

| District Name       | Men           |           | Women         |           |
|---------------------|---------------|-----------|---------------|-----------|
|                     | Relative Risk | 95% CI    | Relative Risk | 95% CI    |
| Cuitat Vella        | 1.07          | 0.93–1.23 | 1.11          | 0.96–1.29 |
| Eixample            | 1.15          | 1.05–1.26 | 1.19          | 1.09–1.29 |
| Sants-Montjuïc      | 1.10          | 0.98–1.23 | 1.14          | 1.01–1.28 |
| Les Corts           | 0.97          | 0.81–1.17 | 0.92          | 0.77–1.11 |
| Sarrià-Sant Gervasi | 1.04          | 0.90–1.19 | 1.05          | 0.93–1.19 |
| Gràcia              | 1.03          | 0.89–1.18 | 1.25          | 1.10–1.42 |
| Horta-Guinardó      | 1.17          | 1.04–1.31 | 1.24          | 1.10–1.39 |
| Nou-Barris          | 1.03          | 0.92–1.16 | 1.14          | 1.01–1.30 |
| Sant Andreu         | 1.28          | 1.12–1.47 | 1.23          | 1.07–1.41 |
| Sant Martí          | 1.07          | 0.96–1.19 | 1.22          | 1.09–1.36 |

**Table S3.** District wise relative risk for all-cause mortality (lag 0–3 days) by education group during the study period 1992–2015 in Barcelona.

| District Name       | No Education  |           | With Education |           |
|---------------------|---------------|-----------|----------------|-----------|
|                     | Relative Risk | 95% CI    | Relative Risk  | 95% CI    |
| Cuitat Vella        | 1.06          | 0.90–1.25 | 1.11           | 0.89–1.38 |
| Eixample            | 1.18          | 1.06–1.30 | 1.16           | 1.05–1.28 |
| Sants-Montjuïc      | 1.14          | 1.00–1.30 | 1.00           | 0.85–1.19 |
| Les Corts           | 0.98          | 0.78–1.24 | 0.89           | 0.73–1.07 |
| Sarrià-Sant Gervasi | 1.19          | 0.98–1.43 | 0.98           | 0.87–1.11 |
| Gràcia              | 1.08          | 0.92–1.26 | 1.10           | 0.94–1.28 |
| Horta-Guinardó      | 1.19          | 1.04–1.37 | 1.15           | 0.98–1.36 |
| Nou-Barris          | 1.08          | 0.93–1.25 | 1.13           | 0.92–1.38 |
| Sant Andreu         | 1.21          | 1.04–1.41 | 1.27           | 1.04–1.55 |
| Sant Martí          | 1.08          | 0.95–1.22 | 1.22           | 1.04–1.44 |
